# Supplementary material for: Toward a designed genetic system with biochemical function: polymerase synthesis of single and multiple size-expanded DNA base pairs
Source: Royal Society of Chemistry journal article supplement (doi:10.1039/c002766a), 2010-01-01
Supplement: c002766a.pdf [file c002766a.pdf]

## SUPPLEMENTARY INFORMATION

### **Toward a Designed Genetic System with Biochemical Function: Polymerase Synthesis of Single and Multiple Size-expanded DNA Base Pairs**

Haige Lu, Andrew T. Krueger, Jianmin Gao, Haibo Liu, Eric T. Kool\*

Department of Chemistry, Stanford University, Stanford, CA 94305

\*to whom correspondence should be addressed: kool@stanford.edu

#### **CONTENTS:**

|                                                                                      |      |
|--------------------------------------------------------------------------------------|------|
| <b>Table S1.</b> Kinetic data for insertion of dNTPs opposite xDNA bases by Dpo4.... | p. 2 |
| <b>Table S2.</b> Kinetic data for extension beyond an xDNA pair by Kf exo-.....      | p. 3 |
| <b>Table S3.</b> Kinetic data for extension beyond an xDNA pair by Dpo4.....         | p. 4 |

**Table S1.** Steady-state kinetics for insertion of single nucleotides opposite size-expanded bases by Dpo4 polymerase. <sup>a</sup>

| Template Base | dNTP | $k_{\text{cat}}$ ( $\text{min}^{-1}$ ) | $K_{\text{m}}$ ( $\mu\text{M}$ ) | $10^6 \times \frac{k_{\text{cat}}}{K_{\text{m}}} (\text{min}^{-1} \cdot \mu\text{M}^{-1})$ | $f_{\text{ins}}$ (rel) |
|---------------|------|----------------------------------------|----------------------------------|--------------------------------------------------------------------------------------------|------------------------|
| xA            | A    | 0.023±0.004                            | 417±5                            | $5.5 \times 10^1$                                                                          | $6.0 \times 10^{-2}$   |
| xA            | C    | ND <sup>b</sup>                        | ND                               | $<10^1$                                                                                    | $<1 \times 10^{-2}$    |
| xA            | G    | 0.012±0.001                            | 519±29                           | $2.3 \times 10^1$                                                                          | $2.5 \times 10^{-2}$   |
| xA            | T    | 0.49±0.15                              | 514±17                           | $9.2 \times 10^2$                                                                          | 1                      |
| xC            | A    | 0.037±0.003                            | 250±21                           | $1.5 \times 10^2$                                                                          | $2.0 \times 10^{-1}$   |
| xC            | C    | 0.056±0.007                            | 148±31                           | $4.1 \times 10^2$                                                                          | $5.4 \times 10^{-1}$   |
| xC            | G    | 0.44±0.09                              | 574±38                           | $7.6 \times 10^2$                                                                          | 1                      |
| xC            | T    | 0.23±0.02                              | 432±81                           | $5.6 \times 10^2$                                                                          | $7.4 \times 10^{-1}$   |
| xG            | A    | 0.027±0.008                            | 487±139                          | $5.6 \times 10^1$                                                                          | $2.1 \times 10^{-2}$   |
| xG            | C    | 0.25±0.04                              | 92±16                            | $2.7 \times 10^3$                                                                          | 1                      |
| xG            | G    | 0.026±0.007                            | 307±75                           | $8.3 \times 10^1$                                                                          | $3.1 \times 10^{-2}$   |
| xG            | T    | 0.081±0.022                            | 642±208                          | $1.3 \times 10^2$                                                                          | $4.8 \times 10^{-2}$   |
| xT            | A    | 0.53±0.13                              | 307±96                           | $1.8 \times 10^3$                                                                          | 1                      |
| xT            | C    | 0.59±0.07                              | 319±45                           | $1.9 \times 10^3$                                                                          | $1.1 \times 10^0$      |
| xT            | G    | 0.041±0.002                            | 791±158                          | $5.8 \times 10^1$                                                                          | $3.2 \times 10^{-2}$   |
| xT            | T    | 1.2±0.2                                | 552±155                          | $2.4 \times 10^3$                                                                          | $1.3 \times 10^0$      |
| A             | T    | 4.4±0.3                                | 18±3                             | $2.6 \times 10^5$                                                                          | -                      |
| C             | G    | 5.5±0.5                                | 21±1                             | $2.6 \times 10^5$                                                                          | -                      |
| G             | C    | 11±3                                   | 8±1                              | $1.3 \times 10^6$                                                                          | -                      |
| T             | A    | 7.9±0.7                                | 15±2                             | $5.4 \times 10^5$                                                                          | -                      |
| A             | A    | 0.15±0.02                              | 348±81                           | $4.5 \times 10^2$                                                                          | -                      |
| G             | T    | 0.28±0.12                              | 328±162                          | $9.8 \times 10^2$                                                                          | -                      |
| T             | G    | 0.77±0.03                              | 385±30                           | $2.0 \times 10^3$                                                                          | -                      |

<sup>a</sup>Conditions: 5  $\mu\text{M}$  template-primer duplex, 40 mM Tris-HCl (pH=8.0), 5 mM  $\text{MgCl}_2$ , 10 mM dithiothreitol, 250  $\mu\text{g/mL}$  bovine serum albumin, and various concentrations of dNTPs, incubated at 37 °C in a reaction volume of 10  $\mu\text{L}$ . Data are averaged from triplicates; standard deviations are shown.  $V_{\text{max}}$  was normalized to 1  $\mu\text{M}$  enzyme concentration. <sup>b</sup>Not determined due to very low insertion efficiency.

**Table S2.** Steady-state kinetics data for Kf (exo-)-catalyzed extension of a C-G pair immediately beyond the size-expanded base pairs and mismatches shown.<sup>a</sup>

| Template Base | Primer Base | $V_{\max}$ ( $\mu\text{M}\cdot\text{min}^{-1}$ ) | $K_m$ ( $\mu\text{M}$ ) | $10^6 \times V_{\max}/K_m$ | $f_{\text{ext}}$ (rel) |
|---------------|-------------|--------------------------------------------------|-------------------------|----------------------------|------------------------|
| xA            | A           | 0.0011±0.0001                                    | 141±6                   | $7.7 \times 10^0$          | $1.4 \times 10^{-1}$   |
| xA            | C           | ND <sup>b</sup>                                  | ND                      | <1                         | $< 2 \times 10^{-2}$   |
| xA            | G           | 0.00092±0.00003                                  | 131±13                  | $7.2 \times 10^0$          | $1.3 \times 10^{-1}$   |
| xA            | T           | 0.011±0.002                                      | 248±87                  | $5.5 \times 10^1$          | 1                      |
| xC            | A           | 0.00082±0.00003                                  | 156±19                  | $5.4 \times 10^0$          | $1.1 \times 10^0$      |
| xC            | C           | 0.011±0.001                                      | 94±16                   | $1.2 \times 10^2$          | $2.6 \times 10^1$      |
| xC            | G           | 0.00053±0.00010                                  | 119±36                  | $4.6 \times 10^0$          | 1                      |
| xC            | T           | 0.059±0.030                                      | 54±22                   | $9.4 \times 10^2$          | $2.0 \times 10^2$      |
| xG            | A           | 0.0087±0.0010                                    | 163±13                  | $5.3 \times 10^1$          | $7.0 \times 10^0$      |
| xG            | C           | 0.0015±0.0002                                    | 201±43                  | $7.6 \times 10^0$          | 1                      |
| xG            | G           | ND <sup>b</sup>                                  | ND                      | <1                         | $< 2 \times 10^{-2}$   |
| xG            | T           | 0.063±0.002                                      | 198±12                  | $3.2 \times 10^2$          | $4.2 \times 10^1$      |
| xT            | A           | 0.0027±0.0002                                    | 172±11                  | $1.6 \times 10^1$          | 1                      |
| xT            | C           | 0.24±0.05                                        | 182±71                  | $1.4 \times 10^3$          | $8.8 \times 10^1$      |
| xT            | G           | ND <sup>b</sup>                                  | ND                      | <1                         | $< 2 \times 10^{-2}$   |
| xT            | T           | 0.038±0.004                                      | 85±5                    | $4.4 \times 10^2$          | $2.8 \times 10^1$      |
| A             | T           | 0.44±0.05                                        | 0.42±0.09               | $1.2 \times 10^6$          | -                      |
| A             | A           | 0.0025±0.0003                                    | 122±13                  | $2.1 \times 10^1$          | -                      |
| G             | T           | 0.084±0.030                                      | 296±114                 | $2.8 \times 10^2$          | -                      |

<sup>a</sup>Conditions: 0.5  $\mu\text{M}$  template-primer duplex, 100 mM Tris•HCl (pH=7.5), 10 mM  $\text{MgCl}_2$ , 1 mM dithiothreitol and 100 $\mu\text{g}/\text{mL}$  serum albumin, varied concentrations of dCTP, incubated at 37 °C in a reaction volume of 10  $\mu\text{L}$ . Data are averaged from triplicates; standard deviations are shown.  $V_{\max}$  was normalized to 0.005 unit/ $\mu\text{L}$  enzyme concentration. <sup>b</sup>Not determined due to low extension efficiency.

**Table S3.** Steady-state kinetics data for Dpo4-catalyzed extension of a C-G pair immediately beyond size-expanded base pairs.<sup>a</sup>

| Template Base | Primer Base | $k_{\text{cat}}$ ( $\text{min}^{-1}$ ) | $K_{\text{m}}$ ( $\mu\text{M}$ ) | $10^6 \times k_{\text{cat}}/K_{\text{m}}$ ( $\text{min}^{-1} \cdot \mu\text{M}^{-1}$ ) | $f_{\text{ext}}$ (rel) |
|---------------|-------------|----------------------------------------|----------------------------------|----------------------------------------------------------------------------------------|------------------------|
| xA            | A           | ND <sup>b</sup>                        | ND                               | $<10^3$                                                                                | ND                     |
| xA            | C           | ND <sup>b</sup>                        | ND                               | $<10^3$                                                                                | ND                     |
| xA            | G           | ND <sup>b</sup>                        | ND                               | $<10^3$                                                                                | ND                     |
| xA            | T           | $3.5 \pm 0.6$                          | $15 \pm 4$                       | $2.3 \times 10^5$                                                                      | 1                      |
| xC            | A           | ND <sup>b</sup>                        | ND                               | $<10^3$                                                                                | ND                     |
| xC            | C           | ND <sup>b</sup>                        | ND                               | $<10^3$                                                                                | ND                     |
| xC            | G           | $6.6 \pm 0.9$                          | $163 \pm 31$                     | $4.1 \times 10^4$                                                                      | 1                      |
| xC            | T           | $6.3 \pm 0.1$                          | $80 \pm 6$                       | $7.9 \times 10^4$                                                                      | $1.9 \times 10^0$      |
| xG            | A           | ND <sup>b</sup>                        | ND                               | $<10^3$                                                                                | ND                     |
| xG            | C           | $2.4 \pm 0.1$                          | $68 \pm 5$                       | $3.5 \times 10^4$                                                                      | $1.2 \times 10^0$      |
| xG            | G           | ND <sup>b</sup>                        | ND                               | $<10^3$                                                                                | ND                     |
| xG            | T           | ND <sup>b</sup>                        | ND                               | $<10^3$                                                                                | ND                     |
| xT            | A           | $2.5 \pm 0.7$                          | $89 \pm 16$                      | $2.7 \times 10^4$                                                                      | 1                      |
| xT            | C           | $3.1 \pm 0.4$                          | $106 \pm 21$                     | $3.0 \times 10^4$                                                                      | $1.1 \times 10^0$      |
| xT            | G           | ND <sup>b</sup>                        | ND                               | $<10^3$                                                                                | ND                     |
| xT            | T           | $10.7 \pm 1.7$                         | $84 \pm 35$                      | $1.5 \times 10^5$                                                                      | $5.6 \times 10^0$      |
| A             | T           | $18 \pm 4$                             | $4.5 \pm 0.7$                    | $4.0 \times 10^6$                                                                      | -                      |
| C             | G           | $31 \pm 4$                             | $7.2 \pm 0.1$                    | $4.2 \times 10^6$                                                                      | -                      |
| G             | C           | $23 \pm 4$                             | $14 \pm 4$                       | $1.6 \times 10^6$                                                                      | -                      |
| T             | A           | $34 \pm 3$                             | $6.2 \pm 0.6$                    | $5.5 \times 10^6$                                                                      | -                      |
| G             | T           | $2.9 \pm 0.2$                          | $140 \pm 23$                     | $2.2 \times 10^4$                                                                      | -                      |
| T             | G           | $6.0 \pm 0.5$                          | $156 \pm 14$                     | $3.9 \times 10^4$                                                                      | -                      |

<sup>a</sup>Conditions: 5  $\mu\text{M}$  template-primer duplex, 40 mM Tris-HCl (pH=8.0), 5 mM  $\text{MgCl}_2$ , 10 mM dithiothreitol, 250  $\mu\text{g}/\text{mL}$  bovine serum albumin (BSA), and various concentrations of dCTPs, incubated at 37 °C in a reaction volume of 10  $\mu\text{L}$ . Data are averaged from triplicates; standard deviations are shown.  $V_{\text{max}}$  was normalized to 1  $\mu\text{M}$  enzyme concentration. <sup>b</sup>Not determined due to very low extension efficiency.
